# Supplementary material
Source: Springer Nature journal article supplement (https://www.springermedizin.de/resource/supplementary/12955_2005_222_MOESM2_ESM.pdf/9559934)

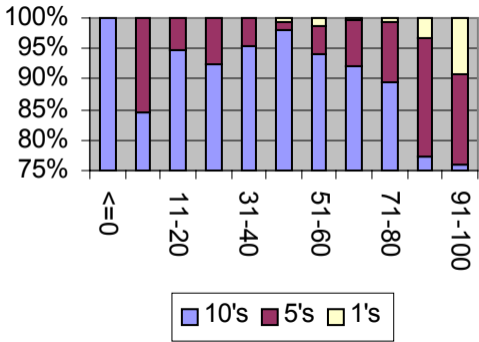

Supplement: MOESM2 [file 9559934]
